# Supplementary material for: Retinal Vascular Imaging in Vascular Cognitive Impairment: Current and Future Perspectives
Source: PubMed Central journal article supplement — J Exp Neurosci. 2018 Sep 20;12:1179069518801291. doi: 10.1177/1179069518801291 (PMC6149015; doi:10.1177/1179069518801291), 2018-09-20
Supplement: Appendix_(3).pdf [file Appendix_%283%29.pdf]

## Literature Search Terms

(((((vascular cognitive decline) OR vascular cognitive dysfunction) OR vascular cognitive impairment) OR vascular dementia)) AND (((retinal disease) OR retinal signs) OR retinal vessels)

## PRISMA Flow Diagram of Study Selection

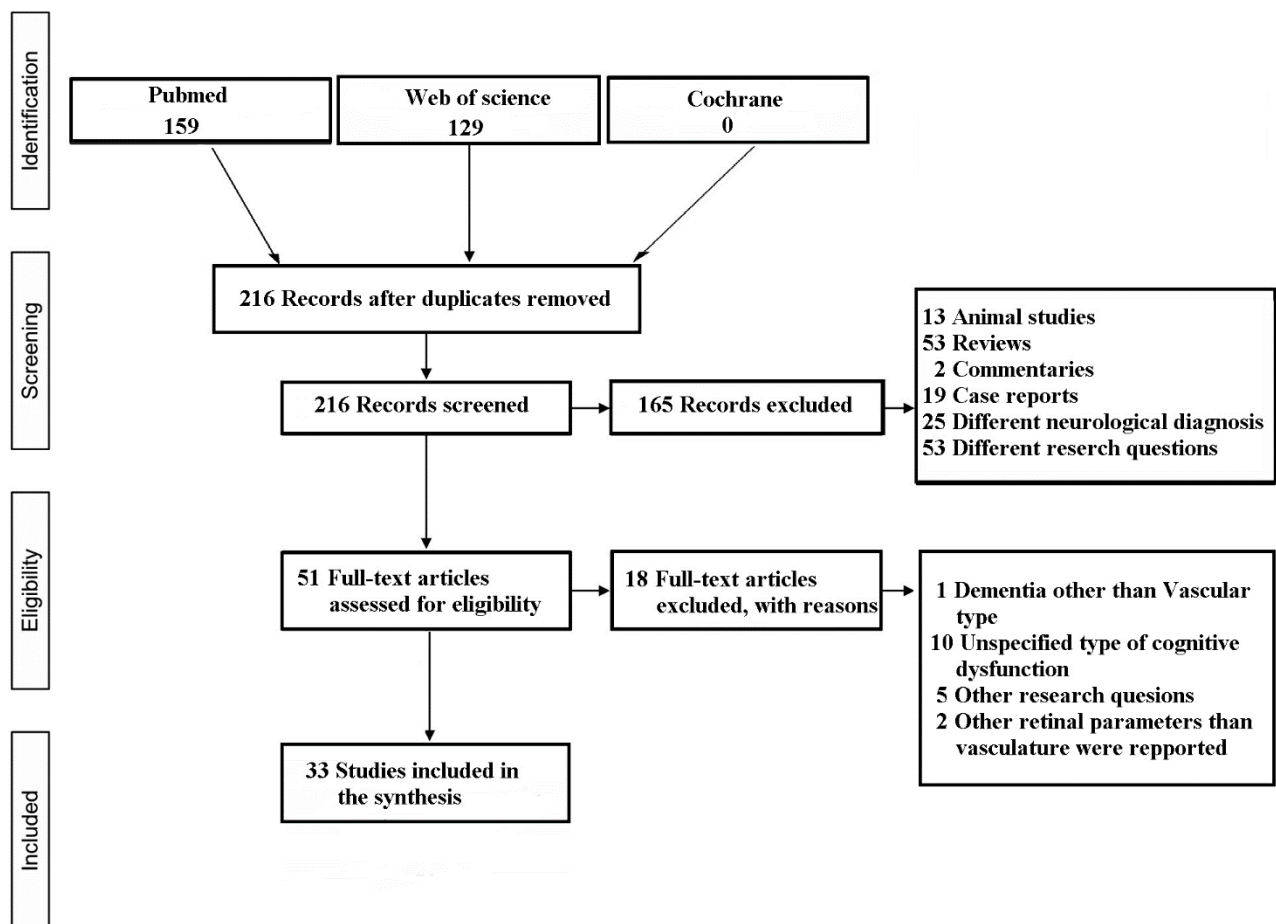

## Bibliography of included studies

1. Alten FM, J.//Ewering, C.//Osada, N.//Clemens, C. R.//Kadas, E. M.//Eter, N.//Paul, F.//Marziniak, M. Multimodal retinal vessel analysis in CADASIL patients. *PLoS One* 2014; **9**(11): e112311.
2. Bettermann KS, J. E.//Shivkumar, V.//Lott, M. E. J. Retinal vasoreactivity as a marker for chronic ischemic white matter disease? *Journal of the Neurological Sciences* 2012; **322**(1-2): 206-10.
3. Bulut MK, F.//Gozkaya, O.//Erol, M. K.//Cengiz, A.//Akidan, M.//Yaman, A. Evaluation of optical coherence tomography angiographic findings in Alzheimer's type dementia. *British Journal of Ophthalmology* 2018; **102**(2): 233-7.
4. Cavallari MF, T.//Frontali, M.//Romano, S.//Bagnato, F.//Orzi, F. Fractal analysis reveals reduced complexity of retinal vessels in CADASIL. *PLoS One* 2011; **6**(4): e19150.
5. Cavallari MS, C.//Umeton, R.//Calimeri, F.//Orzi, F. Novel Method for Automated Analysis of Retinal Images: Results in Subjects with Hypertensive Retinopathy and CADASIL. *BioMed research international* 2015; **2015**: 752957.
6. Cheung CYLO, Y. T.//Ikram, M. K.//Ong, S. Y.//Li, X.//Hilal, S.//Catindig, J. A. S.//Venketasubramanian, N.//Yap, P.//Seow, D.//Chen, C. P.//Wong, T. Y. Microvascular network alterations in the retina of patients with Alzheimer's disease. *Alzheimers & Dementia* 2014; **10**(2): 135-42.
7. Cheung CYO, S.//Ikram, M. K.//Ong, Y. T.//Chen, C. P.//Venketasubramanian, N.//Wong, T. Y. Retinal vascular fractal dimension is associated with cognitive dysfunction. *Journal of stroke and cerebrovascular diseases : the official journal of National Stroke Association* 2014; **23**(1): 43-50.
8. Csincsik LM, T. J.//Flynn, E.//Pellegrini, E.//Papanastasiou, G.//Barzegar-Befroei, N.//Csutak, A.//Bird, A. C.//Ritchie, C. W.//Peto, T.//Lengyel, I. Peripheral Retinal Imaging Biomarkers for Alzheimer's Disease: A Pilot Study. *Ophthalmic Research* 2018; **59**(4): 182-92.
9. Cumurciuc RM, P.//Paques, M.//Krisovic, V.//Gaudric, A.//Boussier, M. G.//Chabriat, H. Retinal abnormalities in CADASIL: a retrospective study of 18 patients. *Journal of neurology, neurosurgery, and psychiatry* 2004; **75**(7): 1058-60.
10. de Jong FJS, E. M. C.//Ikram, M. K.//Koudstaal, P. J.//de Jong, P. J. M.//Hofman, A.//Vingerling, J. R.//Breteler, M. M. B. Retinal vascular caliber and risk of dementia The Rotterdam Study. *Neurology* 2011; **76**(9): 816-21.
11. Deal JAS, A. R.//Rawlings, A. M.//Gottesman, R. F.//Bandein-Roche, K.//Albert, M.//Knopman, D.//Selvin, E.//Wasserman, B. A.//Klein, B.//Klein, R. Retinal signs and 20-year cognitive decline in the Atherosclerosis Risk in Communities Study. *Neurology* 2018; **90**(13): e1158-e66.
12. Ding JS, M. W. J.//Fowkes, F. G. R.//Wong, T. Y.//MacGillivray, T. J.//Patton, N.//Gardiner, T. A.//Deary, I. J.//Price, J. F. Association of retinal arteriolar dilatation with lower verbal memory: the Edinburgh Type 2 Diabetes Study. *Diabetologia* 2011; **54**(7): 1653-62.
13. Fang XJY, M.//Wu, Y.//Zhang, Z. H.//Wang, W. W.//Wang, Z. X.//Yuan, Y. Study of Enhanced Depth Imaging Optical Coherence Tomography in Cerebral Autosomal Dominant Arteriopathy with Subcortical Infarcts and Leukoencephalopathy. *Chinese medical journal* 2017; **130**(9): 1042-8.
14. Frost SB, A.//Offerman, D.//Doecke, J. D.//Macaulay, S. L.//Sohrabi, H. R.//Ames, D.//Masters, C.//Martins, R. N.//Kanagasingam, Y.//Aibl Res Grp. Modulation of Retinal

Arteriolar Central Reflection by APOE Genotype. *Current Alzheimer Research* 2017; **14**(9): 916-23.

15. Frost SK, Y.//Sohrabi, H.//Vignarajan, J.//Bourgeat, P.//Salvado, O.//Villemagne, V.//Rowe, C. C.//Macaulay, S. L.//Szoeki, C.//Ellis, K. A.//Ames, D.//Masters, C. L.//Rainey-Smith, S.//Martins, R. N.//Aibl Res Grp. Retinal vascular biomarkers for early detection and monitoring of Alzheimer's disease. *Translational Psychiatry* 2013; **3**.
16. Golzan SMG, K.//Georgevsky, D.//Avolio, A.//Chatterjee, P.//Shen, K.//Gupta, V.//Chung, R.//Savage, G.//Orr, C. F.//Martins, R. N.//Graham, S. L. Retinal vascular and structural changes are associated with amyloid burden in the elderly: ophthalmic biomarkers of preclinical Alzheimer's disease. *Alzheimers Research & Therapy* 2017; **9**.
17. Hanff TCS, A. R.//Mosley, T. H.//Shibata, D.//Knopman, D. S.//Klein, R.//Klein, B. E. K.//Gottesman, R. F. Retinal Microvascular Abnormalities Predict Progression of Brain Microvascular Disease An Atherosclerosis Risk in Communities Magnetic Resonance Imaging Study. *Stroke* 2014; **45**(4): 1012-7.
18. Haritoglou CH, J. P.//Stefani, F. H.//Mehraein, P.//Kampik, A.//Dichgans, M. Histopathological abnormalities in ocular blood vessels of CADASIL patients. *Am J Ophthalmol* 2004; **138**(2): 302-5.
19. Harju MT, S.//Summanen, P.//Viitanen, M.//Poyhonen, M.//Nikoskelainen, E.//Kalimo, H.//Kivela, T. Scanning laser Doppler flowmetry shows reduced retinal capillary blood flow in CADASIL. *Stroke* 2004; **35**(11): 2449-52.
20. Jiang HL, Y.//Wei, Y.//Shi, Y.//Wright, C. B.//Sun, X.//Rundek, T.//Baumel, B. S.//Landman, J.//Wang, J. Impaired retinal microcirculation in patients with Alzheimer's disease. *PLoS One* 2018; **13**(2): e0192154.
21. Jiang HW, Y.//Shi, Y.//Wright, C. B.//Sun, X.//Gregori, G.//Zheng, F.//Vanner, E. A.//Lam, B. L.//Rundek, T.//Wang, J. Altered Macular Microvasculature in Mild Cognitive Impairment and Alzheimer Disease. *Journal of neuro-ophthalmology : the official journal of the North American Neuro-Ophthalmology Society* 2017.
22. Jinnouchi HK, A.//Yamagishi, K.//Kiyama, M.//Imano, H.//Okada, T.//Cui, R.//Umesawa, M.//Muraki, I.//Hayama-Terada, M.//Kawasaki, R.//Sankai, T.//Ohira, T.//Iso, H.//Circs Investigators. Retinal Vascular Changes and Prospective Risk of Disabling Dementia: the Circulatory Risk in Communities Study (CIRCS). *Journal of Atherosclerosis and Thrombosis* 2017; **24**(7): 687-95.
23. Liu YW, Y.//Xie, S.//Luan, X. H.//Yuan, Y. Retinal arterial abnormalities correlate with brain white matter lesions in cerebral autosomal dominant arteriopathy with subcortical infarcts and leucoencephalopathy. *Clinical & experimental ophthalmology* 2008; **36**(6): 532-6.
24. Nelis PK, I.//Burg, M. C.//Clemens, C. R.//Alnawaiseh, M.//Motte, J.//Marziniak, M.//Eter, N.//Alten, F. OCT-Angiography reveals reduced vessel density in the deep retinal plexus of CADASIL patients. *Scientific Reports* 2018; **8**.
25. Nunley KAM, A. L.//Klein, R.//Klein, B. E.//Saxton, J. A.//Orchard, T. J.//Costacou, T.//Aizenstein, H. J.//Rosano, C. Long-term changes in retinal vascular diameter and cognitive impairment in type 1 diabetes. *Diabetes & Vascular Disease Research* 2018; **15**(3): 223-32.
26. Ong YTH, S.//Cheung, C. Y.//Xu, X.//Chen, C.//Venketasubramanian, N.//Wong, T. Y.//Ikram, M. K. Retinal vascular fractals and cognitive impairment. *Dementia and geriatric cognitive disorders extra* 2014; **4**(2): 305-13.

27. Pretegianni ER, F.//Dotti, M. T.//Bianchi, S.//Federico, A.//Rufa, A. Visual system involvement in CADASIL. *Journal of stroke and cerebrovascular diseases : the official journal of National Stroke Association* 2013; **22**(8): 1377-84.
28. Qiu CC, M. F.//Sigurdsson, S.//Jonsson, P. V.//Jonsdottir, M. K.//Sveinbjornsdottir, S.//Eiriksdottir, G.//Klein, R.//Harris, T. B.//van Buchem, M. A.//Gudnason, V.//Launer, L. J. Cerebral microbleeds, retinopathy, and dementia The AGES-Reykjavik Study. *Neurology* 2010; **75**(24): 2221-8.
29. Roine SH, M.//Kivela, T. T.//Poyhonen, M.//Nikoskelainen, E.//Tuisku, S.//Kalimo, H.//Viitanen, M.//Summanen, P. A. Ophthalmologic findings in cerebral autosomal dominant arteriopathy with subcortical infarcts and leukoencephalopathy - A cross-sectional study. *Ophthalmology* 2006; **113**(8): 1411-7.
30. Rufa AD, M. T.//Frezzotti, P.//De Stefano, N.//Caporossi, A.//Federico, A. Hemodynamic evaluation of the optic nerve head in cerebral autosomal dominant arteriopathy with subcortical infarcts and leukoencephalopathy. *Archives of neurology* 2004; **61**(8): 1230-3.
31. Ryan CMK, B. E. K.//Lee, K. E.//Cruickshanks, K. J.//Klein, R. Associations between recent severe hypoglycemia, retinal vessel diameters, and cognition in adults with type 1 diabetes. *Journal of Diabetes and Its Complications* 2016; **30**(8): 1513-8.
32. Schrijvers EMB, G. H.//Ikram, M. K.//Koudstaal, P. J.//Hofman, A.//Vingerling, J. R.//Breteler, M. M. Retinopathy and risk of dementia: the Rotterdam Study. *Neurology* 2012; **79**(4): 365-70.
33. Taylor AMM, T. J.//Henderson, R. D.//Ilzina, L.//Dhillon, B.//Starr, J. M.//Deary, I. J. Retinal Vascular Fractal Dimension, Childhood IQ, and Cognitive Ability in Old Age: The Lothian Birth Cohort Study 1936. *Plos One* 2015; **10**(3).
